# Supplementary material for: Direct Heterogeneous Integration of Molybdenum Disulfide via Spin-on Molecular Chemistry
Source: Research Square preprint supplement (doi:10.21203/rs.3.rs-5050473/v1), 2024-10-09
Supplement: Supplementary file 1 [file 1b59d9e2fdcc45d9ee428f90.pdf]

## SUPPLEMENTARY INFORMATION

### Direct Heterogeneous Integration of Molybdenum Disulfide *via* Spin-on Molecular Chemistry

*Healin Im<sup>1,2</sup>, Ayush S. Gupta<sup>1</sup>, David Lu<sup>3</sup>, Mark Buckingham<sup>4</sup>, Ke Ma<sup>1</sup>, Slavomir Nemsak<sup>5</sup>, Naoki Higashitarumizu<sup>2,6,7</sup>, I K M Reaz Rahman<sup>2,6</sup>, Jiayun Liang<sup>1,2</sup>, Jiawei Wan<sup>1,2</sup>, Joshua Herrera<sup>2,3</sup>, Brendan Ward-O'Brien<sup>4</sup>, Joshua Swindle<sup>4</sup>, Ellis A. Spickermann<sup>1</sup>, Xiaohan Ma<sup>8</sup>, Zili Wu<sup>8</sup>, Ke Wang<sup>9</sup>, Adri C.T. van Duin<sup>10</sup>, Nadire Nayir<sup>10,11</sup>, Haimei Zheng<sup>1,2</sup>, Ali Javey<sup>2,6</sup>, Matthew P. Sherburne<sup>1</sup>, David J. Lewis<sup>4</sup>, Jeffrey R. Long<sup>2,3,12</sup>, and Zakaria Y. Al Balushi<sup>1,2,\*</sup>*

<sup>1</sup>Department of Materials Science and Engineering, University of California, Berkeley, CA 94720, United States

<sup>2</sup>Materials Sciences Division, Lawrence Berkeley National Laboratory, CA 94720, United States

<sup>3</sup>Department of Chemistry, University of California, Berkeley, CA 94720, United States

<sup>4</sup>Department of Materials Chemistry, University of Manchester, Oxford Road, Manchester M13 9PL, United Kingdom

<sup>5</sup>Advanced Light Source, Lawrence Berkeley National Laboratory, Berkeley, CA, 94720, United States

<sup>6</sup>Electrical Engineering and Computer Sciences, University of California, Berkeley, CA 94720, United States

<sup>7</sup>JST, PRESTO, 4-1-8 Honcho, Kawaguchi, Saitama, 332-0012 Japan

<sup>8</sup>Center for Nanophase Materials Sciences, Oak Ridge National Laboratory, Oak Ridge, Tennessee 37831, United States

<sup>9</sup>Materials Research Institute, The Pennsylvania State University, University Park, PA, United States

<sup>10</sup>Department of Mechanical Engineering, The Pennsylvania State University, University Park, PA, United States

<sup>11</sup>Department of Physics Engineering, Istanbul Technical University, Istanbul, Turkey

<sup>12</sup>Department of Chemical and Biomolecular Engineering, University of California, Berkeley, CA 94720, United States

\*Corresponding author - email: [albalushi@berkeley.edu](mailto:albalushi@berkeley.edu)

Keywords: xanthate, molybdenum disulfide, selective growth, integration

## Table of Contents

Supplementary Notes 1-4

Supplementary Figures 1-14

Supplementary References 1

## Supplementary Note

### SN1. Photoluminescence quantum yield (PLQY) measurements and analysis:

Photoluminescence quantum yield (PLQY) is the key metric to evaluate the optical quality of two-dimensional semiconductors, which limits the optoelectronic device performances. For quantitative evaluation, the calibrated PLQY of spin-on MoS<sub>2</sub> was measured using a customized micro-PL instrument described in detail in previous studies<sup>1,2</sup>, defined as:

$$PLQY = \frac{\text{Number of photons emitted}}{\text{Number of photons absorbed}}$$

An Ar ion laser with a 514.5 nm line was used as the excitation source. All PL signals were collected using a 50× objective lens and passed through a 550 nm dielectric long-pass filter to obtain the emission signal from the MoS<sub>2</sub>. The PL signal was dispersed by a spectrometer with a 340-mm focal length and 150 groove-mm<sup>-1</sup> grating and detected using a Si CCD (charge-coupled device) (Andor iDUS BEX2-DD). Before each measurement, the CCD background was deducted from the PL acquisition signal.

The systems' relative sensitivity versus wavelength was evaluated by measuring the response of a virtual Lambertian black body light source created under the objective via illumination from a temperature stabilized lamp (ThorLabs SLS201) imaged onto a diffuse reflector (> 1 cm thick spectralon) surface. Calibrations were performed using a sample with a known QY close to 100% (rhodamine 6G in methanol)<sup>3</sup> using a procedure which has been previously used to measure QY of other 2D materials<sup>4,5</sup>. The percentage of generated photons



which are able to escape from the sample was extracted following the approach in literature<sup>6</sup>.

## **SN2. Calculation of adsorption energy of Mo<sub>3</sub>S<sub>9</sub> monomer:**

Adsorption energy  $E_{\text{ads}}$  is calculated by the following equation to determine the interaction strength between Mo<sub>3</sub>S<sub>9</sub> monomers and various substrate surfaces.

$$E_{\text{ads}} = E_{\text{total}} - (E_{\text{isolated Mo}_3\text{S}_9} + E_{\text{pristine surface}})$$

Where  $E_{\text{total}}$  is the total system energy of the molecule adsorbing onto the surface,  $E_{\text{isolated Mo}_3\text{S}_9}$  represents the energy of Mo<sub>3</sub>S<sub>9</sub> molecule in isolation, and  $E_{\text{pristine surface}}$  is energy of the clean substrate surface. Given the structural complexity of Mo<sub>3</sub>S<sub>9</sub>, where Mo atoms are arranged in a triangular configuration surrounded by in-plane and out-of-plane S atoms<sup>7-9</sup>, four initial configurations (C1-C4, as shown in Figure S13a) were explored to study the influence of molecular orientation on adsorption strength. In configuration C1, the molecule is oriented with its Mo plane parallel to the surface and the out-of-plane doubly bonded S atoms facing the substrate. Configuration C2 is arranged similarly to C1 but with the opposite side containing two doubly bonded and two singly bonded S atoms directed toward the substrate. Configuration C3 adopts an edge-on orientation with the molecule perpendicular to the surface and interacting with surface atoms primarily through the doubly bonded S atoms at its edge. Configuration C4 features an asymmetric tilted orientation where the molecule engages the surface with two singly bonded S atoms. Analysis shows that configuration C1 consistently leads to the most stable adsorption state with the most negative adsorption energy, while configuration C3 results in the least stable states with a thermodynamically unfavorable energy change (Figure S13).

## **SN3. Comparison of top and bottom-gate modulation of spin-on MoS<sub>2</sub>:**

First devices were fabricated directly on a 300nm SiO<sub>2</sub>/p-doped silicon substrates to compare the performance of SiO<sub>2</sub> bottom-gated structures with and without a 30nm thick ALD Al<sub>2</sub>O<sub>3</sub> top layer serving as a passivation layer and/or top-gate dielectric. This setup allows for the assessment of the appropriate device configuration that would lead to an improved electrical performance within the same channel. Depending on the presence of Al<sub>2</sub>O<sub>3</sub> layer and gate modulation (SiO<sub>2</sub>-bottom or Al<sub>2</sub>O<sub>3</sub>-top), the  $I_{\text{DS}}$  and corresponding conductance ( $g_d$ ) clearly separate into two regimes, while the

current amplification features are well indicative with increasing bias regardless of the gate modulation. As shown in Figure S18d, the device exhibits better transfer characteristics, including an on-current ( $I_{on}$ ) of 3  $\mu$ A and an on/off ratio of  $1.92 \times 10^3$ , under the top-gate modulation with  $Al_2O_3$  compared to bottom-gate modulation without  $Al_2O_3$  layers. We extracted a field-effect mobility ( $\mu_{eff}$ ) of both cases from the following equation.

$$\mu_{eff} = g_m L / W C_{ox} V_{DS}$$

Where  $L$  and  $W$  are the length and width of the channel, respectively.  $g_m$  and  $C_{ox}$  represent the transconductance and the capacitance of the gate dielectric. We found that the  $\mu_{eff}$  of spin-on  $MoS_2$  is significantly enhanced to 0.125  $cm^2/Vs$ , approximately 130 times greater than that without the  $Al_2O_3$  encapsulation. This is attributed to the n-doping effect of the top  $Al_2O_3$  across the  $MoS_2$  channel and contact regions.<sup>10,11</sup> The dielectric screening effect can also contribute to the improved mobility and corresponding subthreshold swings.<sup>12</sup> Based on these results, we optimized the device structure as top-gated FETs and evaluated the electrical uniformity of spin-on  $MoS_2$  grown at 650°C and 750°C.

#### **SN4. Memristor devices based on spin-on $MoS_2$ :**

Au and Ti were selected as the bottom and top electrodes, respectively, due to their electrochemically inertness under the applied electric fields. This selection eliminates interference from the electrodes, allowing us to focus on the inherent properties of spin-on  $MoS_2$ , likely mediated by sulfur vacancies. For the formation of the active channel, a monolayer  $MoS_2$  was prepared *via* spin-coating and annealing at 750°C, then transferred onto a substrate with pre-formed Au electrodes through an etchant-free transfer.

## Supplementary Figures

Formation and characteristics of spin-on MoS<sub>2</sub> via metal xanthate molecular chemistry:

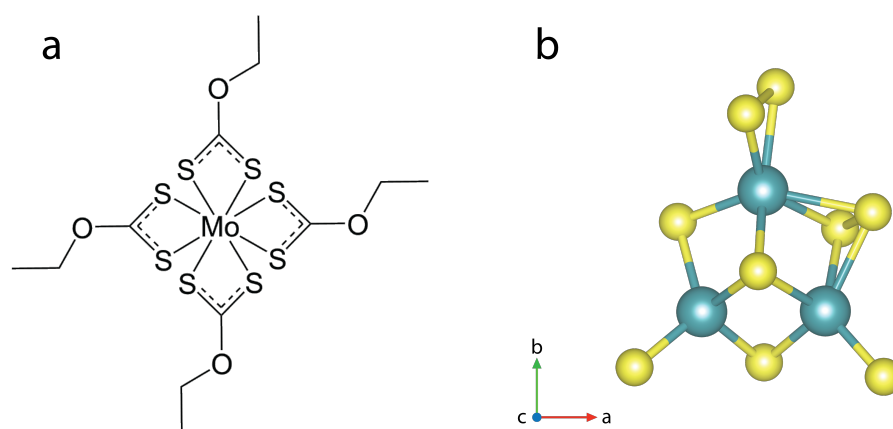

**Figure S1** | Molecular structures of **a**, Mo(S<sub>2</sub>COEt)<sub>4</sub> and **b**, triangular monomer of Mo<sub>3</sub>S<sub>9</sub>.

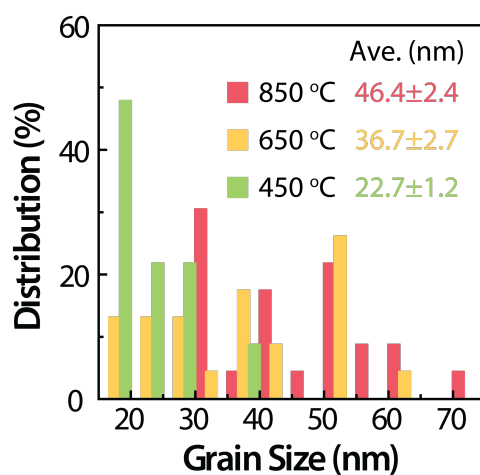

**Figure S2** | Statistics results of grain sizes of spin-on MoS<sub>2</sub> grown at 450°C, 650°C, and 850°C.

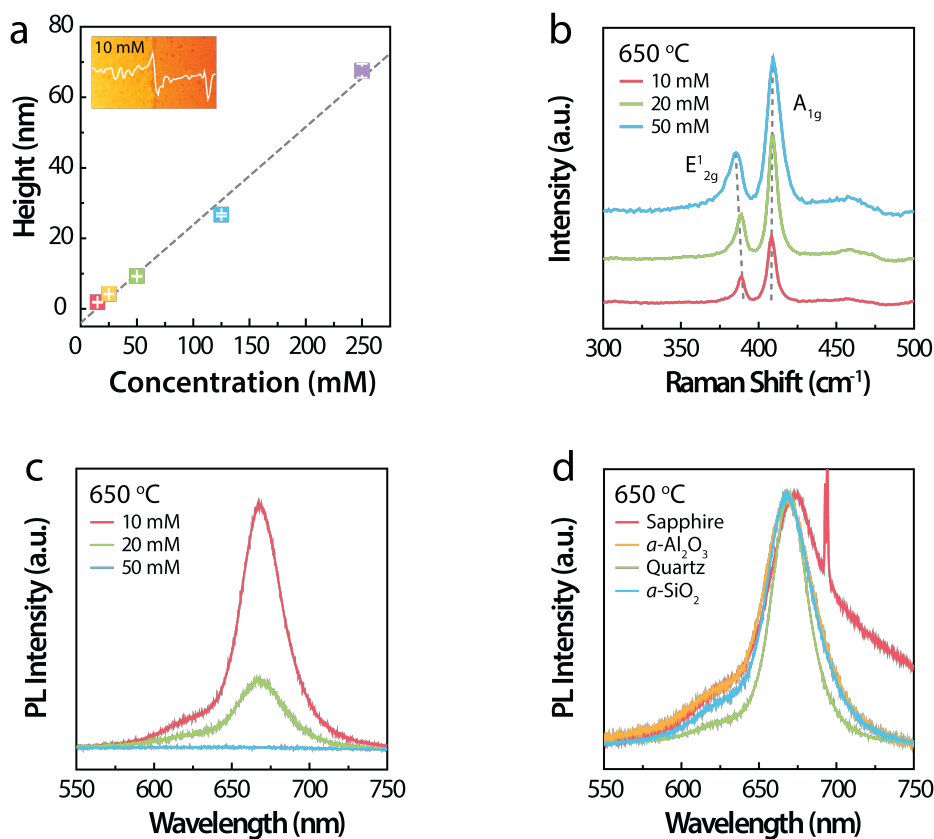

**Figure S3 | Characteristics of spin-on MoS<sub>2</sub> as a function of precursor concentration.** **a**, Concentration-dependent variations in thickness of amorphous MoS<sub>3</sub> films (inset: height profile of a spin-coated film from a 10 mM solution). **b**, Raman and **c**, PL spectra of spin-on MoS<sub>2</sub> at different concentrations of Mo(S<sub>2</sub>COEt)<sub>4</sub>. **d**, PL spectra of spin-on MoS<sub>2</sub> on various substrates.

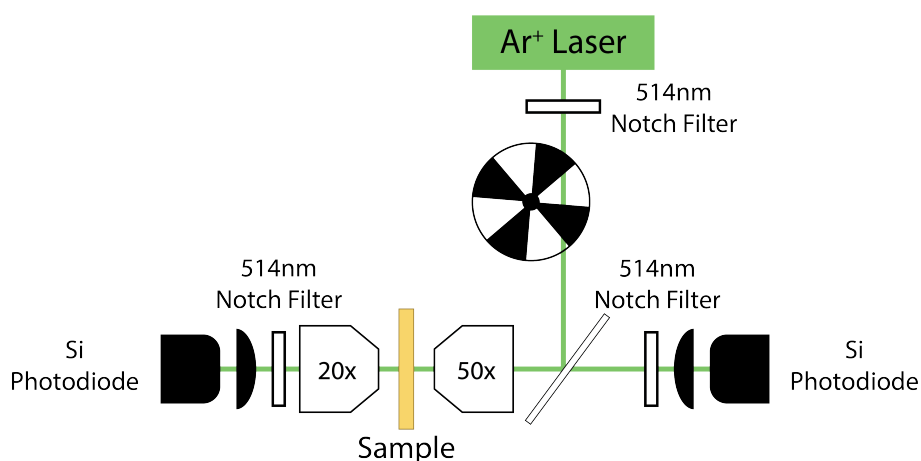

**Figure S4 | Experimental setup for calibrated measurement of PLQY of spin-on MoS<sub>2</sub>.**

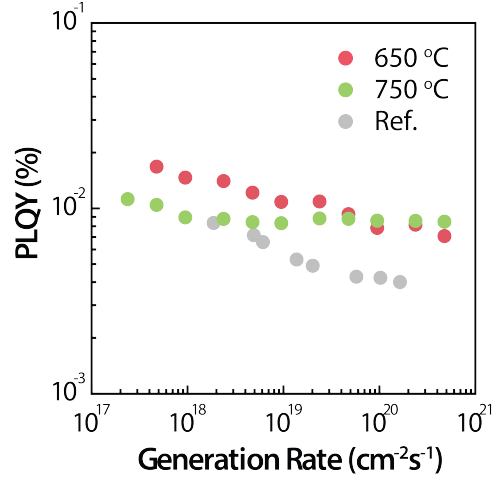

**Figure S5** | A comparison of PLQY between spin-on MoS<sub>2</sub> annealed at 650°C and 750°C with monolayer MoS<sub>2</sub> (reference) exfoliated from a bulk single crystal produce by chemical vapor transport (CVT).

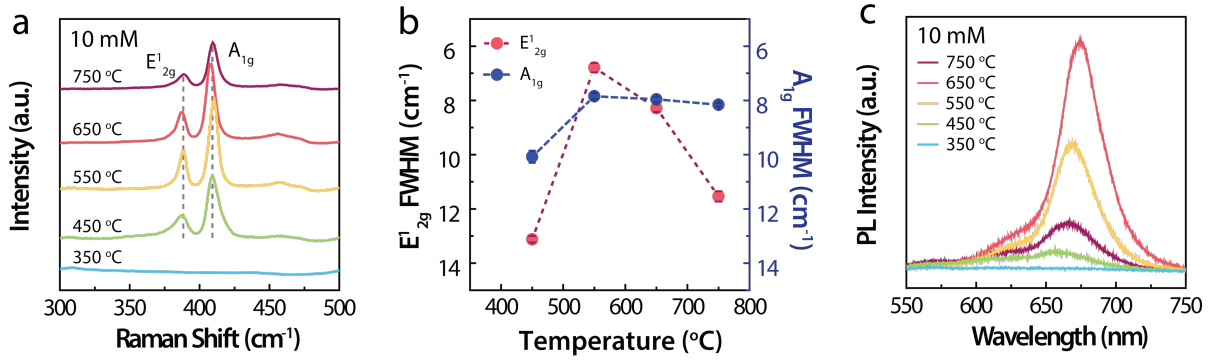

**Figure S6** | **Characteristics of 10mM spin-on MoS<sub>2</sub> as a function of post-annealing temperature.** **a**, Raman spectra and **b**, FWHM profiles of A<sub>1g</sub> and E'<sub>2g</sub> modes of spin-on MoS<sub>2</sub> under various annealing temperatures. **c**, PL spectra of spin-on MoS<sub>2</sub> as a function of annealing temperature.

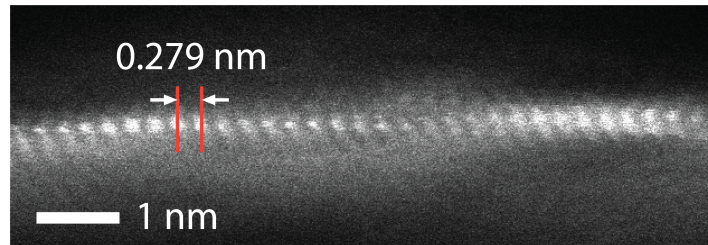

**Figure S7** | Cross-sectional STEM image of monolayer spin-on MoS<sub>2</sub> shown in Figure 2f.

## Evolution of chemical transformation from $\alpha$ -MoS<sub>3</sub> to MoS<sub>2</sub>:

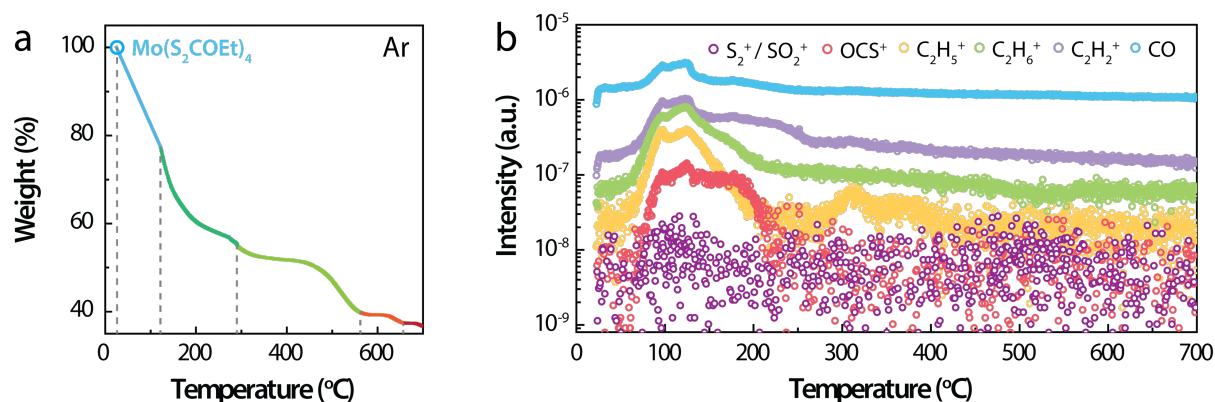

**Figure S8 | TGA-MS analysis of  $\text{Mo}(\text{S}_2\text{COEt})_4$ .** **a**, Mass loss and **b**, Mas-spectroscopy of released gas phase byproducts of thermally annealed  $\text{Mo}(\text{S}_2\text{COEt})_4$  precursor.

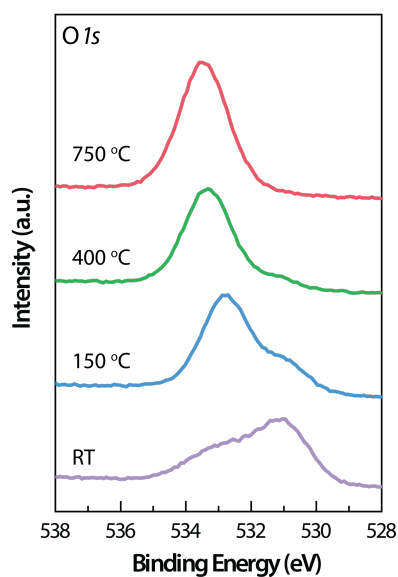

**Figure S9 | Evolution of O 1s core level in *in-situ* temperature dependent AP-XPS collected from  $\alpha$ -MoS<sub>3</sub> formed directly onto a silicon substrate.**

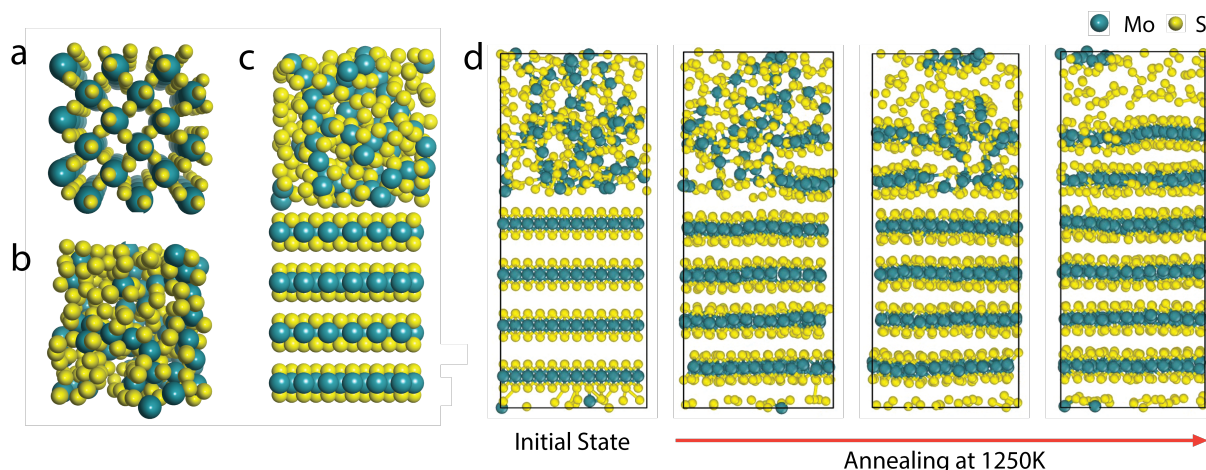

**Figure S10 | Reactive force-field (ReaxFF) molecular dynamics simulations of the transformation process from  $a$ -MoS<sub>3</sub> to crystalline MoS<sub>2</sub>.** **a**, Initial configuration of a triclinic crystal MoS<sub>3</sub>. **b**,  $a$ -MoS<sub>3</sub> obtained *via* a melt-quenching technique from the crystal structure. **c**,  $a$ -MoS<sub>3</sub> placed on four layers of 2H-MoS<sub>2</sub>. **d**, Evolution of  $a$ -MoS<sub>3</sub> transformation to crystalline MoS<sub>2</sub> during annealing at 1250K.

#### Selective-Area formation of the spin-on MoS<sub>2</sub>:

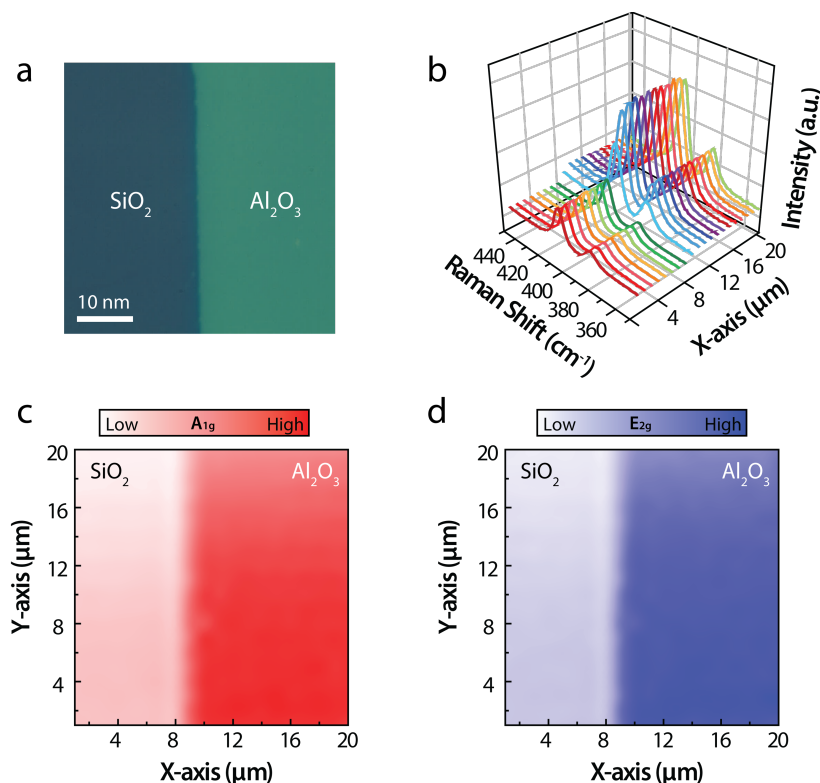

**Figure S11 | Characterization of spin-on MoS<sub>2</sub> formation across Al<sub>2</sub>O<sub>3</sub>-SiO<sub>2</sub> step edge.** **a**, Optical image of MoS<sub>2</sub> over Al<sub>2</sub>O<sub>3</sub>-SiO<sub>2</sub> surfaces and step edge. **b**, Raman spectra obtained across the Al<sub>2</sub>O<sub>3</sub>-SiO<sub>2</sub> step edge region. **c**, A<sub>1g</sub> and **d**, E<sub>2g</sub><sup>1</sup> Raman maps around the region of the optical image in **a**. In this example ALD Al<sub>2</sub>O<sub>3</sub> was deposited onto a SiO<sub>2</sub>/Si substrate.

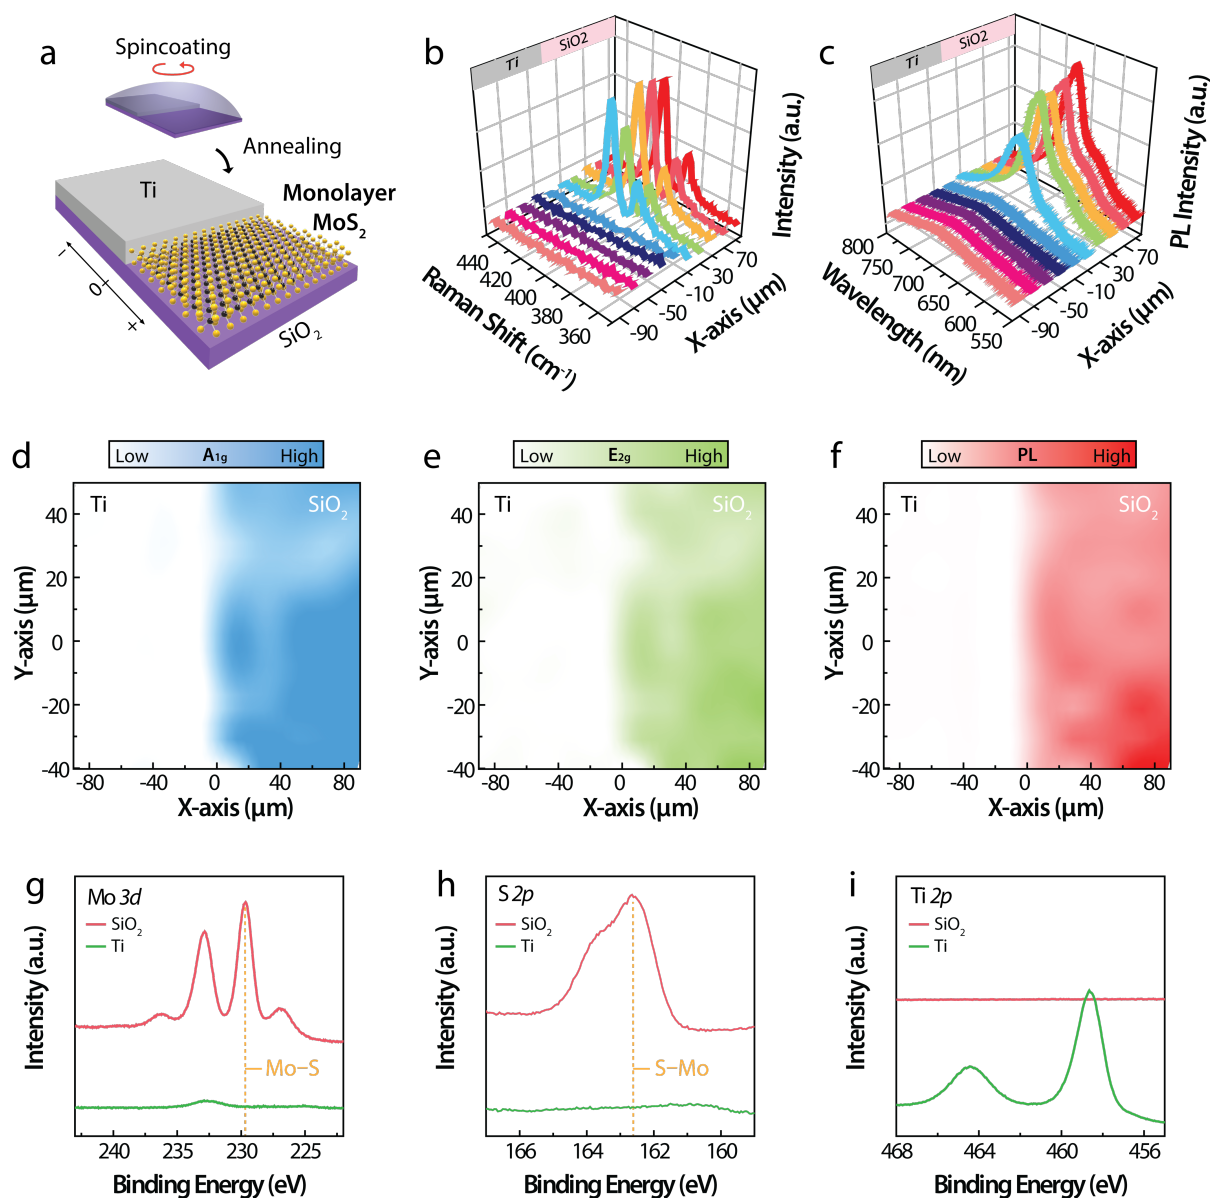

**Figure S12 | Selective area formation of spin-on MoS<sub>2</sub> on SiO<sub>2</sub>/Si substrates with patterned Ti squares on the surface.** **a**, Schematic of selective area formation of monolayer MoS<sub>2</sub>. **b**, Raman and **c**, PL spectra obtained across the Ti-SiO<sub>2</sub> step edge region. **d**, A<sub>1g</sub> and **e**, E<sub>2g</sub> modes of Raman, and **f**, PL maps around the Ti-SiO<sub>2</sub> step edge region. **g**, Mo 3d, **h**, S 2p, and **i**, Ti 2p XPS core levels obtained from the Ti and SiO<sub>2</sub> regions. In this example evaporated Ti was deposited onto a SiO<sub>2</sub>/Si substrate.



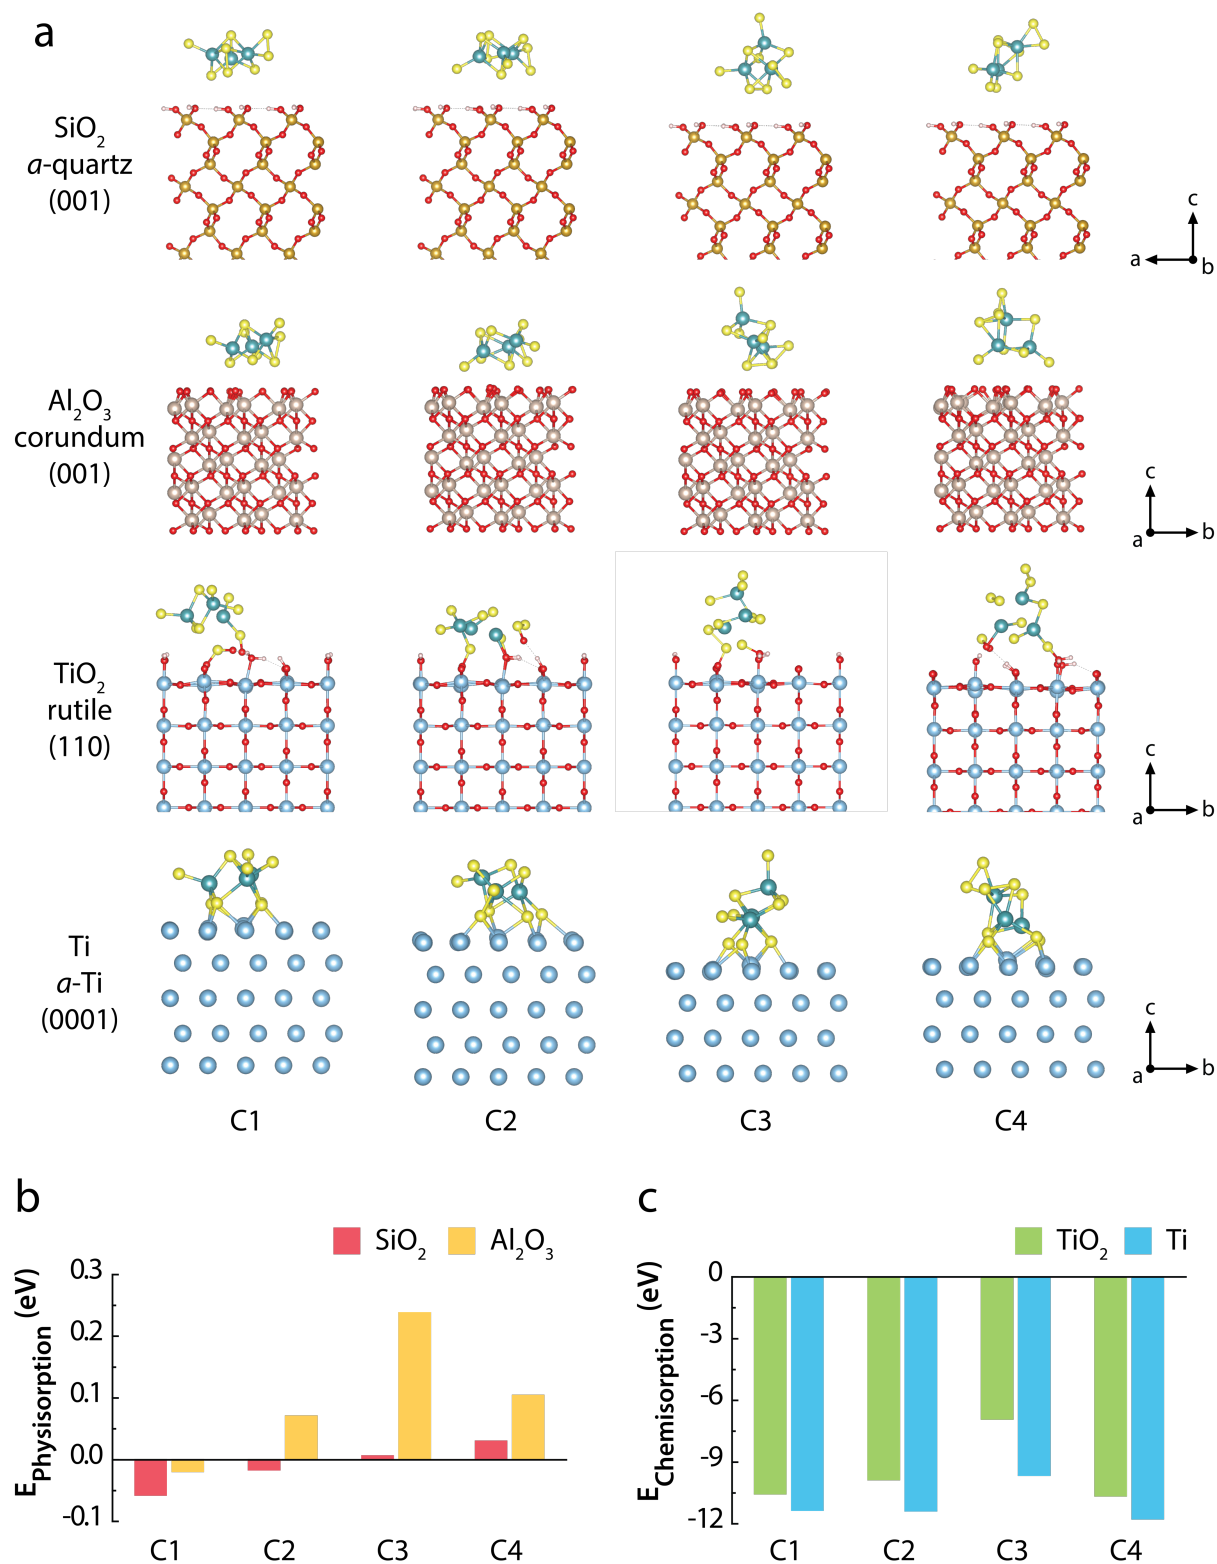

**Figure S13 | DFT calculated adsorptive states and energies of Mo<sub>3</sub>S<sub>9</sub> monomer on various surfaces.** **a**, Visualization of optimized adsorption states. Chemisorption and decomposition of Mo<sub>3</sub>S<sub>9</sub> monomer was observed for all interaction configurations on the Ti and TiO<sub>2</sub> surfaces. Energy of **b**, physisorption and **c**, chemisorption of Mo<sub>3</sub>S<sub>9</sub> precursor on various surfaces at different interaction configurations.

Direct integration of high- $k$  oxides on spin-on MoS<sub>2</sub>:

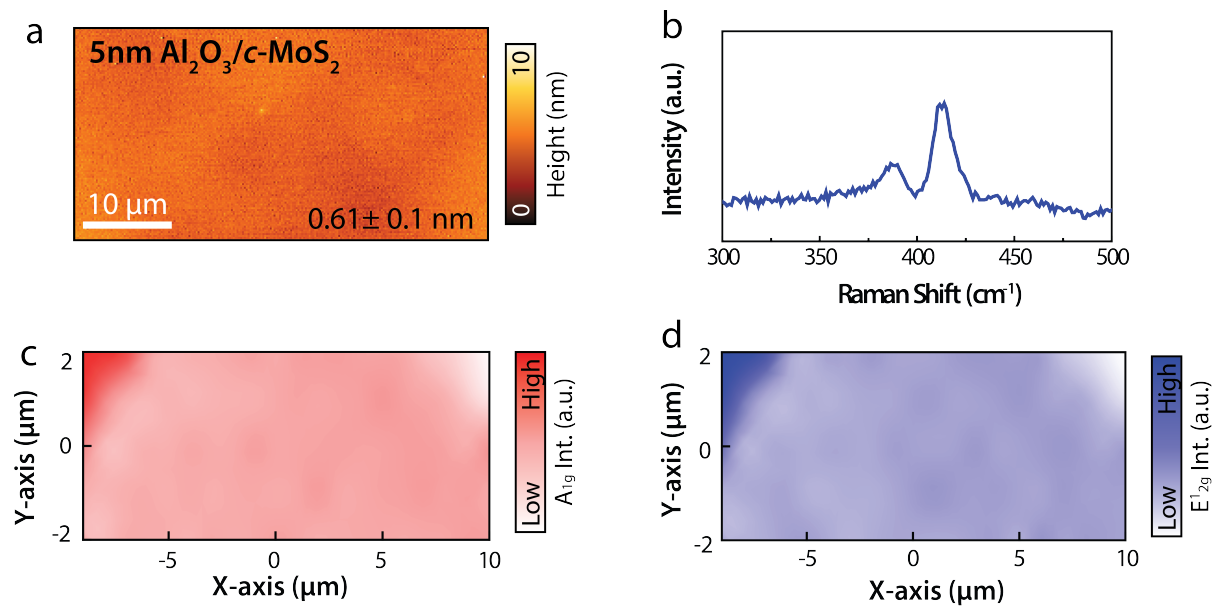

**Figure S14 | AFM and Raman results of the 5 nm Al<sub>2</sub>O<sub>3</sub>/a-MoS<sub>2</sub> structure shown in Fig.5b after post-annealing. a, AFM image, b, Raman spectrum and mapping profiles of c, A<sub>1g</sub> and d, E<sub>12g</sub> modes.**

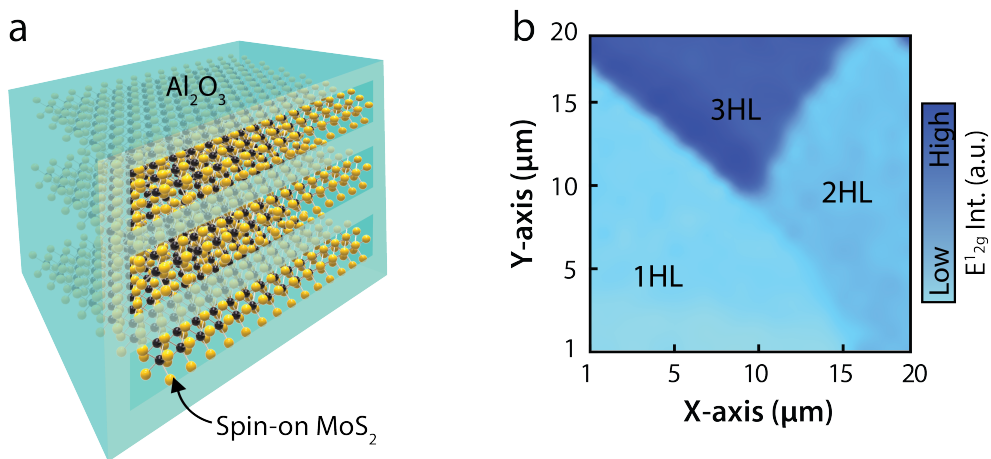

**Figure S15 | a, Schematic illustration of three stacks of Al<sub>2</sub>O<sub>3</sub>/a-MoS<sub>2</sub> and b, Raman mapping of E<sub>12g</sub> mode across three heterolayers (HL) stacks of Al<sub>2</sub>O<sub>3</sub>/spin-on MoS<sub>2</sub>.**

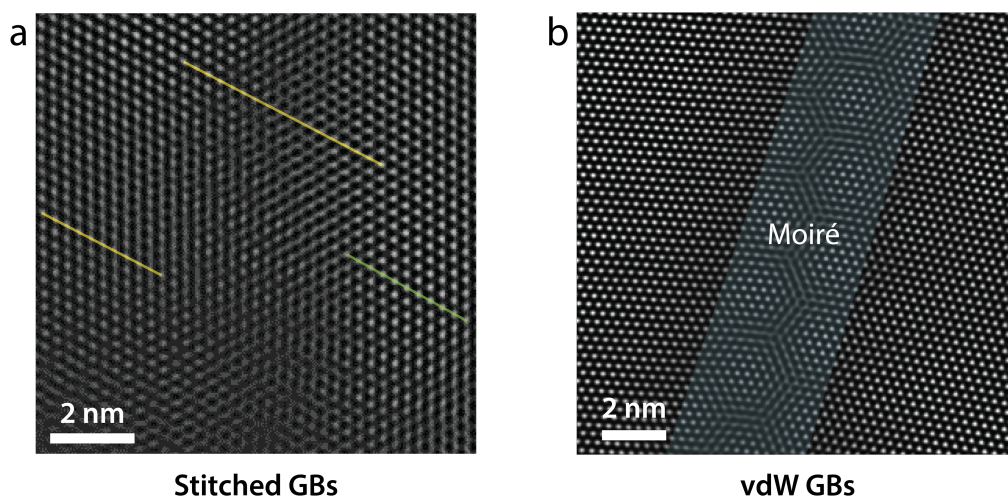

**Figure S16 | Types of grain boundaries (GBs) in spin-on MoS<sub>2</sub>. a, Stitched and b, vdW GBs.**

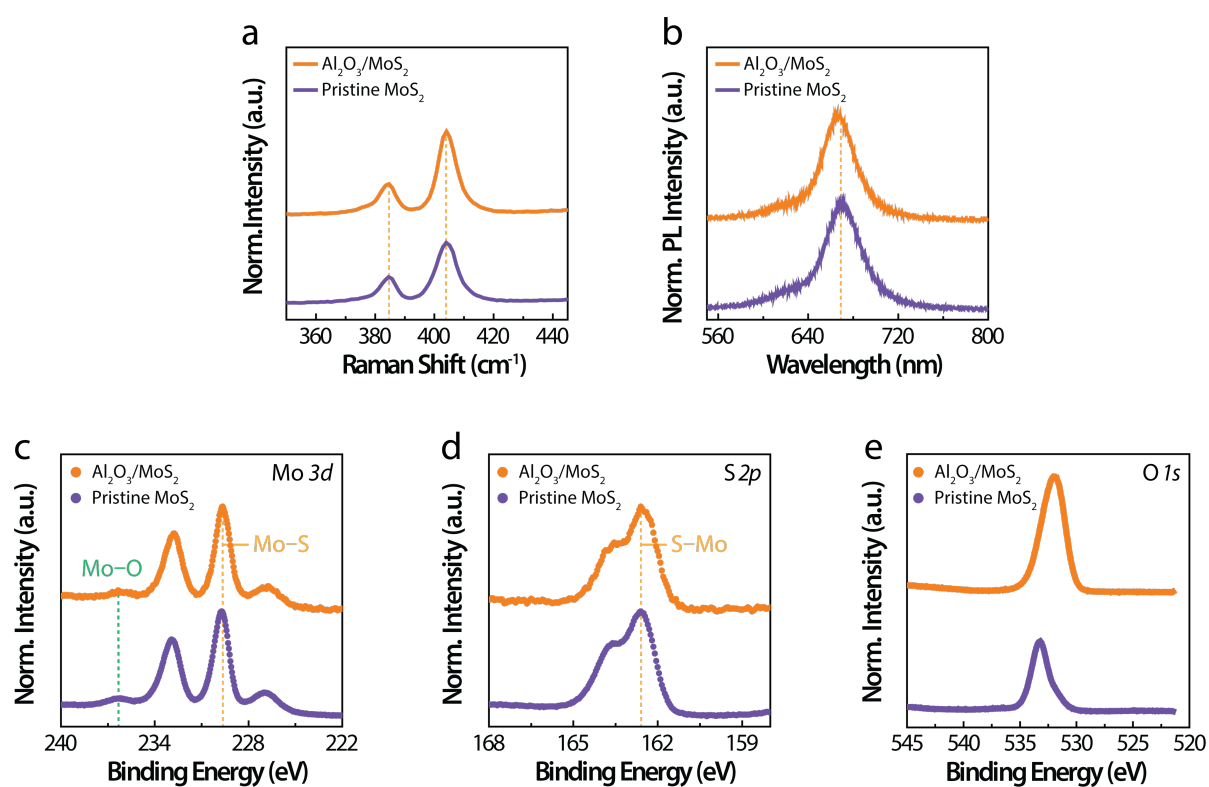

**Figure S17 | Direct high-*k* oxide integration on spin-on MoS<sub>2</sub>. a, Raman, b, PL spectra, and XPS results at c, Mo 3d, d, S 2p, and e, O 1s core levels for the 3 nm Al<sub>2</sub>O<sub>3</sub> deposited directly on post-annealed spin-on monolayer MoS<sub>2</sub>.**

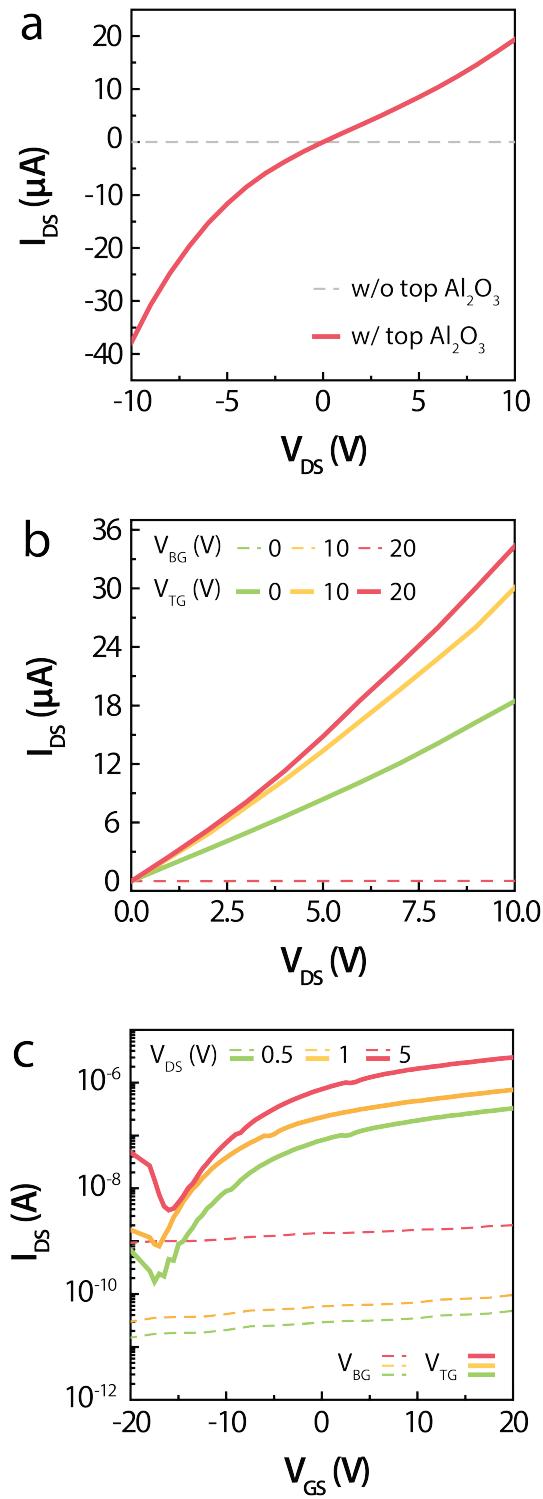

**Figure S18 | Comparison of electrical performance of top-gated and bottom-gated spin-on MoS<sub>2</sub> formed at 750°C. a, Diode, b, Output, and c, Transfer curves of spin-on MoS<sub>2</sub> devices.**

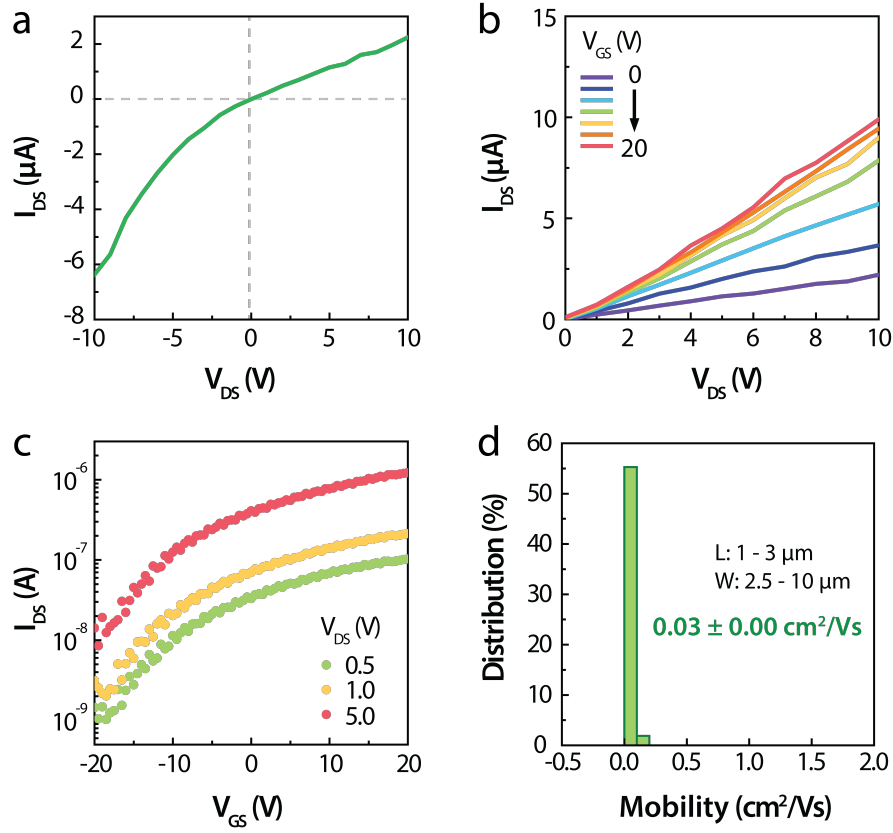

**Figure S19 | Top-gated transistor characteristics of spin-on MoS<sub>2</sub> formed at 650°C. a,** Diode, **b**, Output, **c**, Transfer curves, and **d**, Mobilities distribution of spin-on MoS<sub>2</sub> devices.

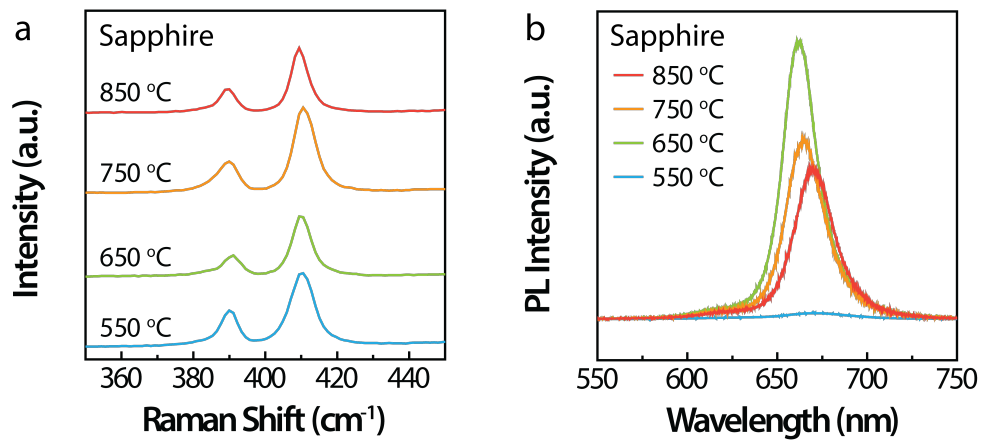

**Figure S20 | Spin-on MoS<sub>2</sub> grown on sapphire substrates. a**, Raman and **b**, PL spectra of spin-on MoS<sub>2</sub> formed between 550°C and 850°C.

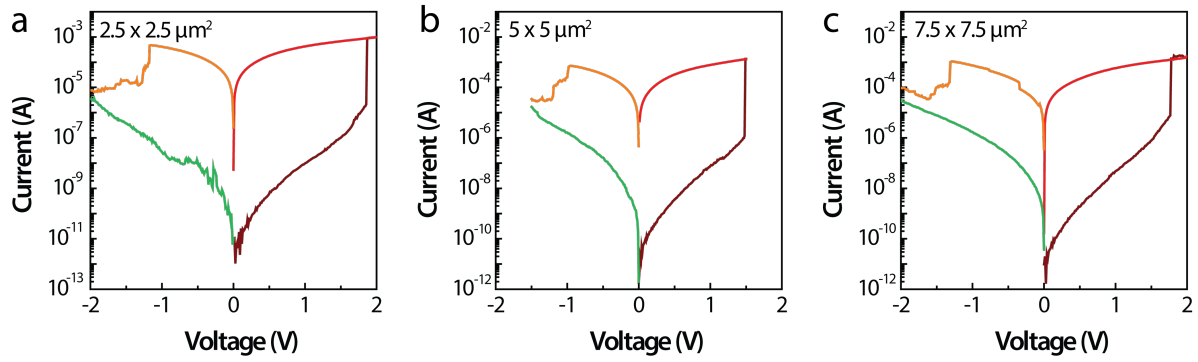

**Figure S21** | Bipolar memory switching behaviors as a function of channel sizes from spin-on MoS<sub>2</sub> formed at 750°C.

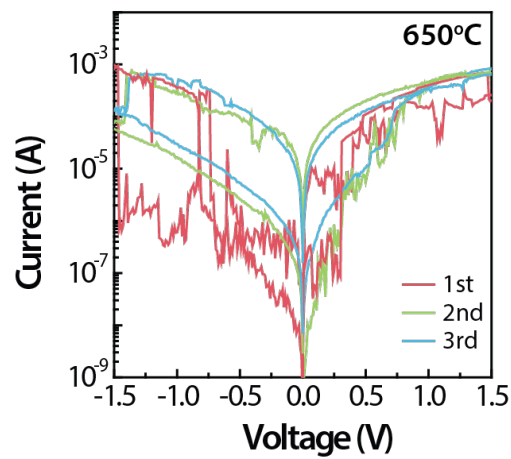

**Fig. S22** | Bipolar memory switching curves of a memristor based on spin-on MoS<sub>2</sub> formed at 650°C.

## Supplementary References:

1. Lien, D.-H. *et al.* Electrical suppression of all nonradiative recombination pathways in monolayer semiconductors. *Science* (80-. ). **364**, 468–471 (2019).
2. Amani, M. *et al.* Near-unity photoluminescence quantum yield in MoS<sub>2</sub>. *Science* (80-. ). **350**, 1065–1068 (2015).
3. Magde, D., Wong, R. & Seybold, P. G. Fluorescence Quantum Yields and Their Relation to Lifetimes of Rhodamine 6G and Fluorescein in Nine Solvents: Improved Absolute Standards for Quantum Yields. *Photochem. Photobiol.* **75**, 327–334 (2007).
4. Wang, H., Zhang, C. & Rana, F. Ultrafast Dynamics of Defect-Assisted Electron–Hole Recombination in Monolayer MoS<sub>2</sub>. *Nano Lett.* **15**, 339–345 (2015).
5. Mak, K. F., Lee, C., Hone, J., Shan, J. & Heinz, T. F. Atomically Thin MoS<sub>2</sub>: A New Direct-Gap Semiconductor. *Phys. Rev. Lett.* **105**, 136805 (2010).
6. Lien, D.-H. *et al.* Engineering Light Outcoupling in 2D Materials. *Nano Lett.* **15**, 1356–1361 (2015).
7. Geng, X. *et al.* Pure and stable metallic phase molybdenum disulfide nanosheets for hydrogen evolution reaction. *Nat. Commun.* **7**, 10672 (2016).
8. Sahu, A., Steinmann, S. N. & Raybaud, P. Size-Dependent Structural, Energetic, and Spectroscopic Properties of MoS<sub>3</sub> Polymorphs. *Cryst. Growth Des.* **20**, 7750–7760 (2020).
9. Hibble, S. J. & Wood, G. B. Modeling the Structure of Amorphous MoS<sub>3</sub> : A Neutron Diffraction and Reverse Monte Carlo Study. *J. Am. Chem. Soc.* **126**, 959–965 (2004).
10. Hong, S. *et al.* Highly sensitive active pixel image sensor array driven by large-area bilayer MoS<sub>2</sub> transistor circuitry. *Nat. Commun.* **12**, 3559 (2021).
11. Choi, M. *et al.* Flexible active-matrix organic light-emitting diode display enabled by MoS<sub>2</sub> thin-film transistor. *Sci. Adv.* **4**, (2018).
12. Li, T., Wan, B., Du, G., Zhang, B. & Zeng, Z. Electrical performance of multilayer MoS<sub>2</sub> transistors on high- $\kappa$  Al<sub>2</sub>O<sub>3</sub> coated Si substrates. *AIP Adv.* **5**, (2015).
